# Supplementary material for: Phase response analyses support a relaxation oscillator model of locomotor rhythm generation in Caenorhabditis elegans
Source: eLife journal article supplement (doi:10.7554/elife.69905), 2021-09-27

# Threshold-switch

# van der Pol

# Rayleigh

# Stuart-Landau

**A** Dorsal-side illumination

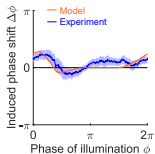

**B** Dorsal-side illumination

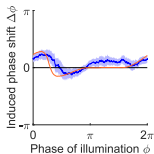

**C** Dorsal-side illumination

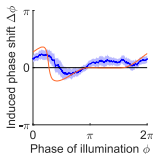

**D** Dorsal-side illumination

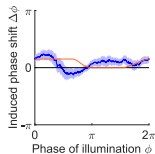

**E** Ventral-side illumination

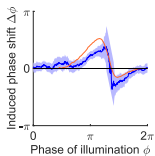

**F** Ventral-side illumination

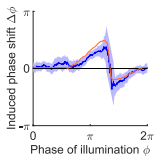

**G** Ventral-side illumination

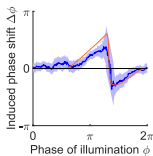

**H** Ventral-side illumination

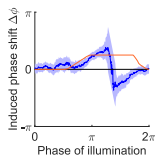

Supplement: supp [file elife_poa_e69905_Figure_6_figure_supplement_2.pdf › elife_poa_e69905_Figure_6_figure_supplement_2.pdf]
