# Supplementary figures and images for: Phase response analyses support a relaxation oscillator model of locomotor rhythm generation in Caenorhabditis elegans
Source: eLife journal article supplement (doi:10.7554/elife.69905), 2021-09-27

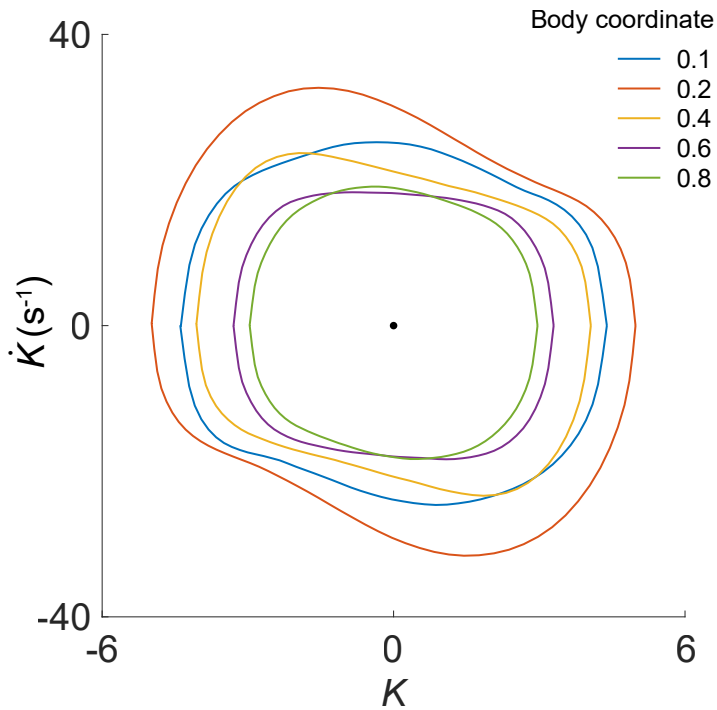

Supplement: supp [file elife_poa_e69905_Figure_2_figure_supplement_1.pdf › elife_poa_e69905_Figure_2_figure_supplement_1.pdf]

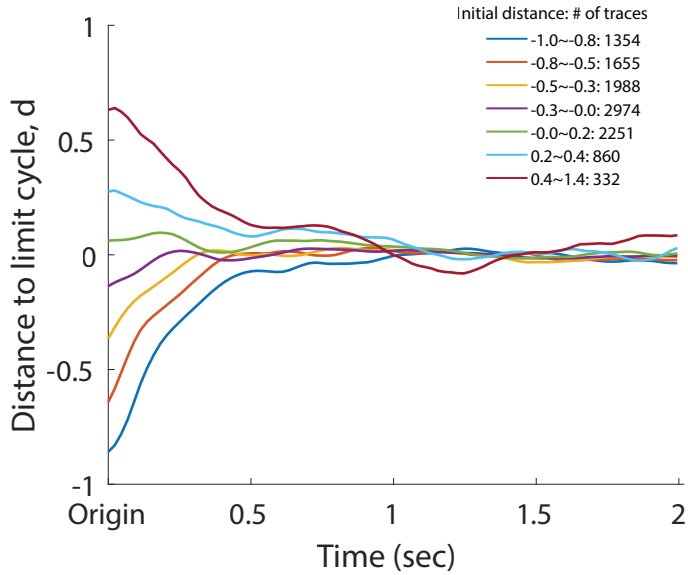

Supplement: supp [file elife_poa_e69905_Figure_3_figure_supplement_1.pdf › elife_poa_e69905_Figure_3_figure_supplement_1.pdf]

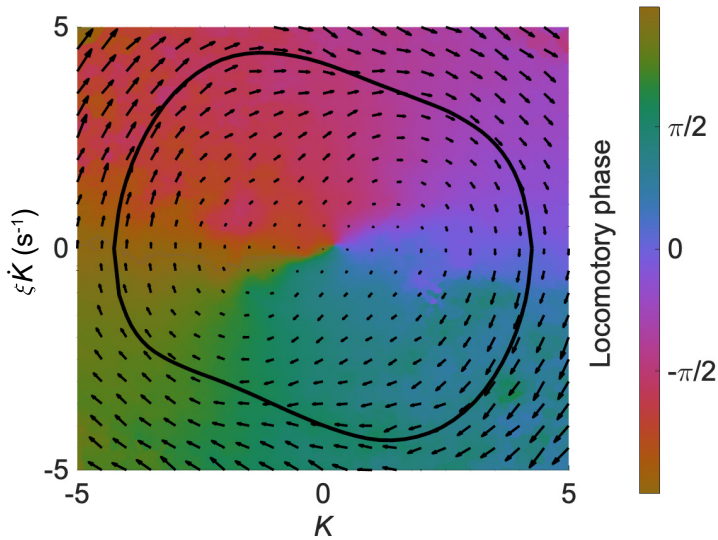

Supplement: supp [file elife_poa_e69905_Figure_3_figure_supplement_2.pdf › elife_poa_e69905_Figure_3_figure_supplement_2.pdf]

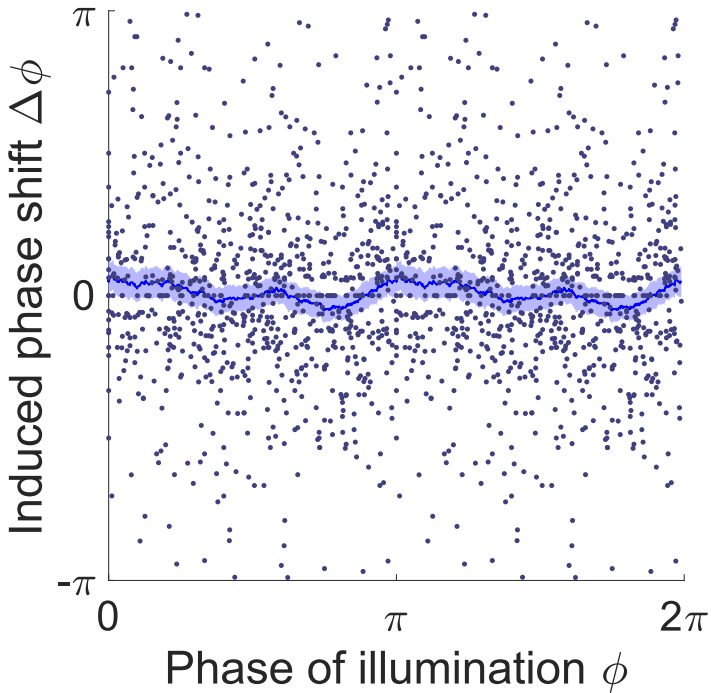

Supplement: supp [file elife_poa_e69905_Figure_3_figure_supplement_3.pdf › elife_poa_e69905_Figure_3_figure_supplement_3.pdf]

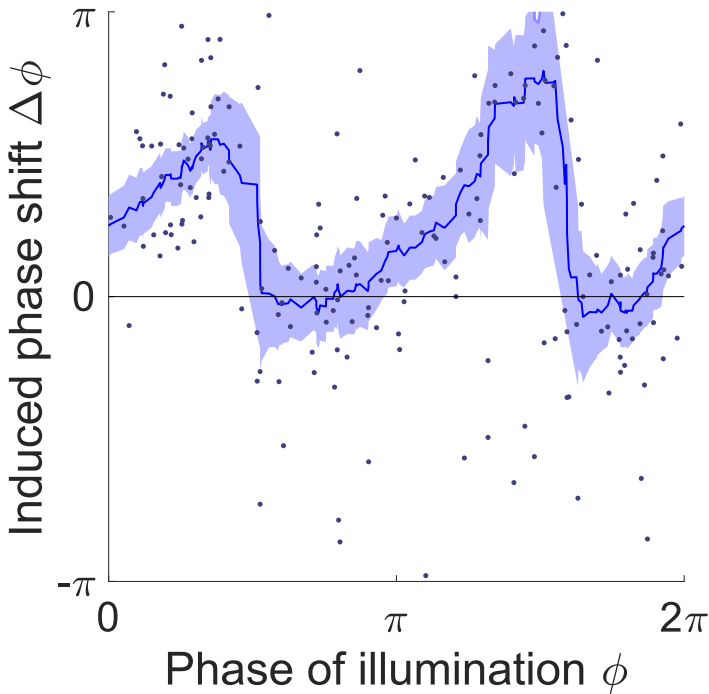

Supplement: supp [file elife_poa_e69905_Figure_3_figure_supplement_4.pdf › elife_poa_e69905_Figure_3_figure_supplement_4.pdf]

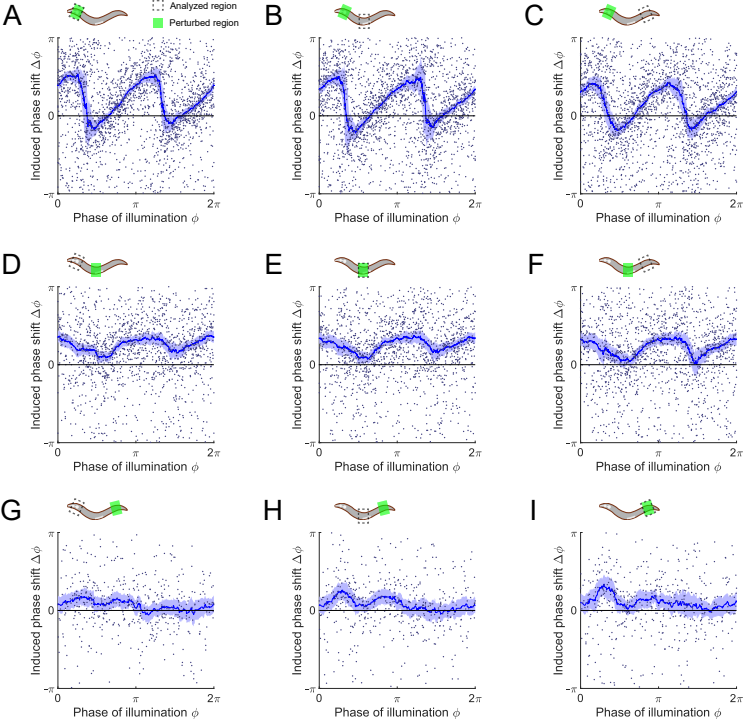

Supplement: supp [file elife_poa_e69905_Figure_3_figure_supplement_5.pdf › elife_poa_e69905_Figure_3_figure_supplement_5.pdf]

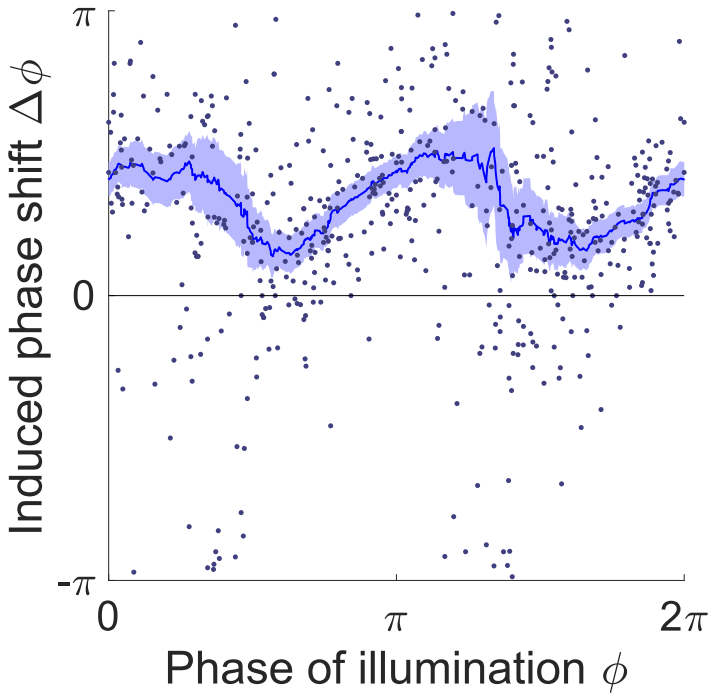

Supplement: supp [file elife_poa_e69905_Figure_3_figure_supplement_6.pdf › elife_poa_e69905_Figure_3_figure_supplement_6.pdf]

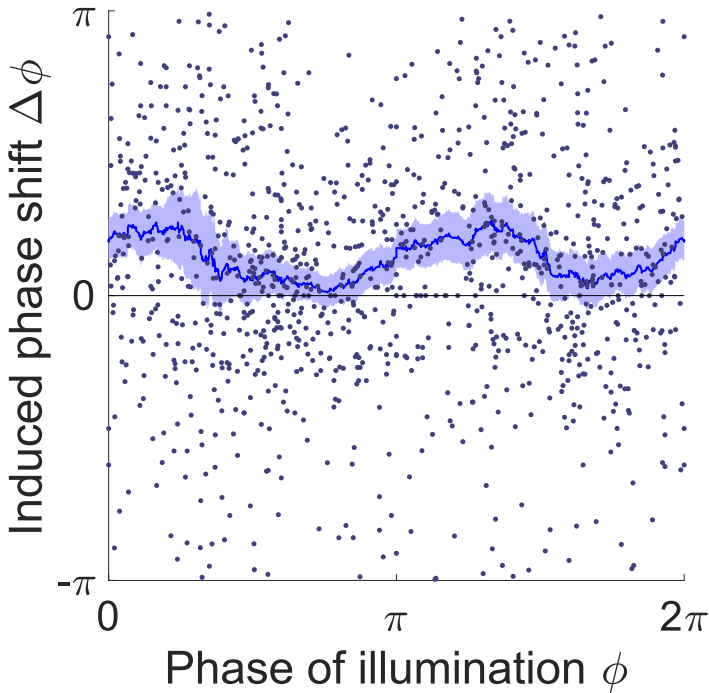

Supplement: supp [file elife_poa_e69905_Figure_3_figure_supplement_7.pdf › elife_poa_e69905_Figure_3_figure_supplement_7.pdf]

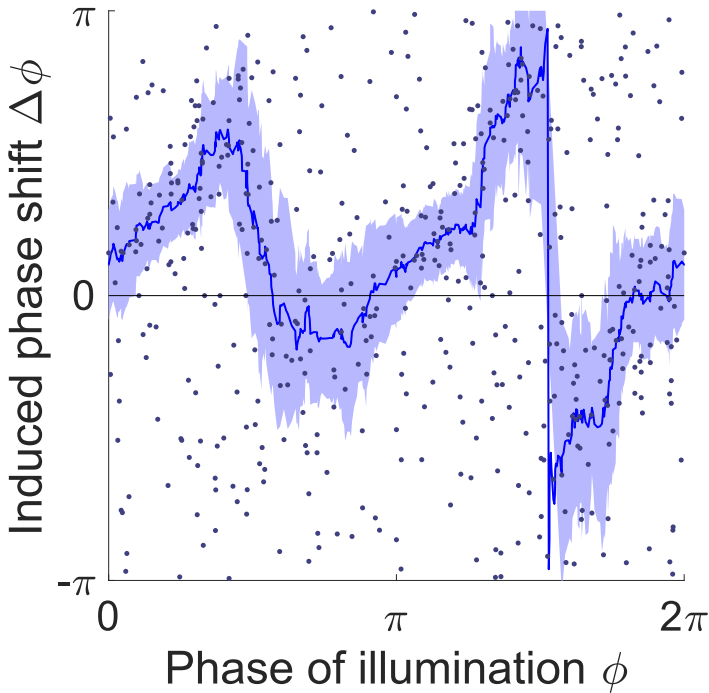

Supplement: supp [file elife_poa_e69905_Figure_3_figure_supplement_8.pdf › elife_poa_e69905_Figure_3_figure_supplement_8.pdf]

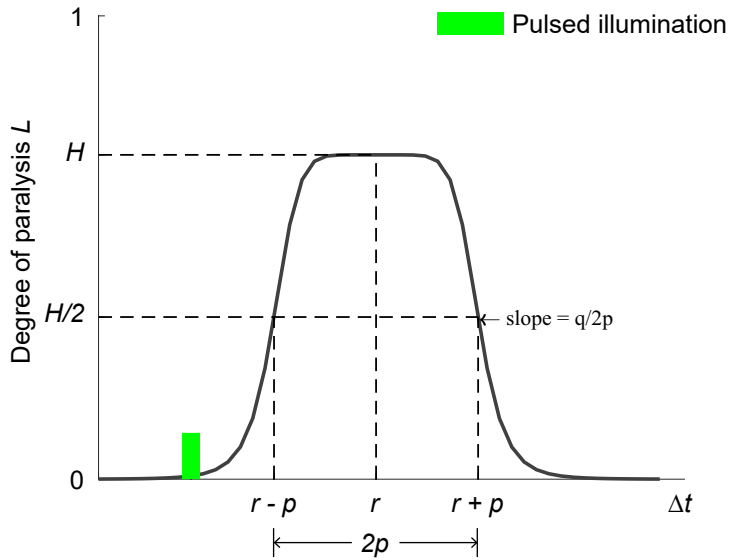

Supplement: supp [file elife_poa_e69905_Figure_4_figure_supplement_1.pdf › elife_poa_e69905_Figure_4_figure_supplement_1.pdf]

# Threshold-switch van der Pol Rayleigh Stuart-Landau

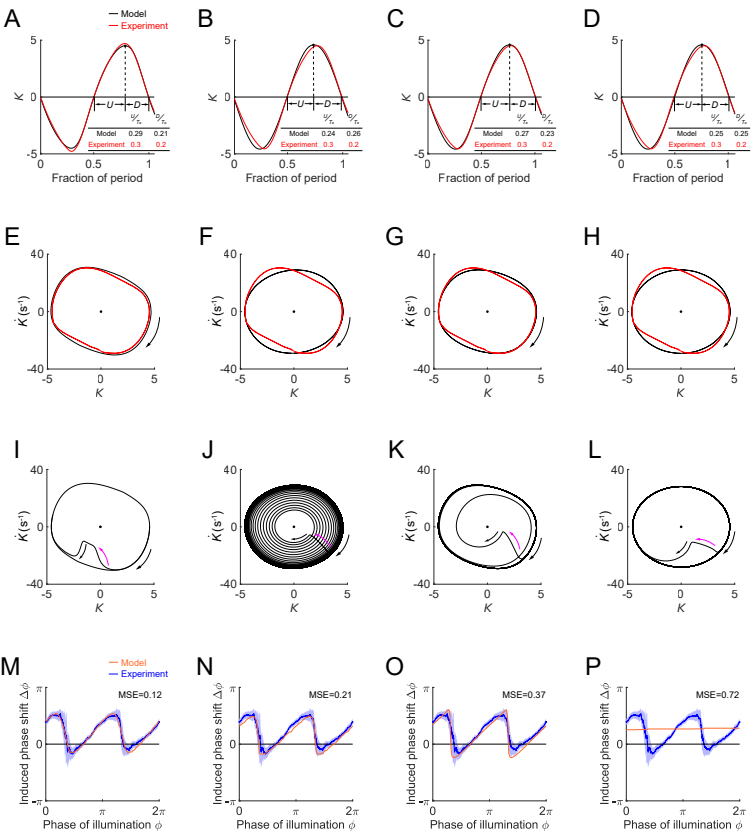

Supplement: supp [file elife_poa_e69905_Figure_5_figure_supplement_1.pdf › elife_poa_e69905_Figure_5_figure_supplement_1.pdf]

**A**Bending state at  $\phi+0.53\pi$ :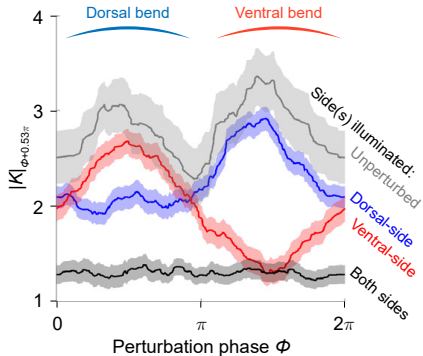**B**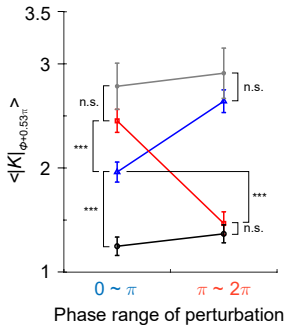

Supplement: supp [file elife_poa_e69905_Figure_6_figure_supplement_1.pdf › elife_poa_e69905_Figure_6_figure_supplement_1.pdf]
